# Supplementary material
Source: PubMed Central journal article supplement (PMC6645887)
Supplement: ao8b00356_si_001.pdf [file ao8b00356_si_001.pdf]

**KatG-mediated oxidation imparts reduced susceptibility of bacteria to kanamycin.**

Peter C. Loewen<sup>a</sup>, P. Malaka De Silva<sup>a</sup>, Lynda J. Donald<sup>a</sup>, Jacek Switala<sup>a</sup>, Jacylyn Villanueva<sup>a</sup>, Ignacio Fita<sup>b</sup>, and Ayush Kumar<sup>a\*</sup>

<sup>a</sup>Department of Microbiology, 45 Chancellor's Circle, University of Manitoba, Winnipeg, MB R3T 2N2, Canada

<sup>b</sup>Instituto de Biologia Molecular de Barcelona (CSIC). Parc Científic de Barcelona, Baldiri i Reixac 10-12, 08028-Barcelona, Spain

\*Correspondence: [Ayush.Kumar@umanitoba.ca](mailto:Ayush.Kumar@umanitoba.ca)

## Supplemental Information

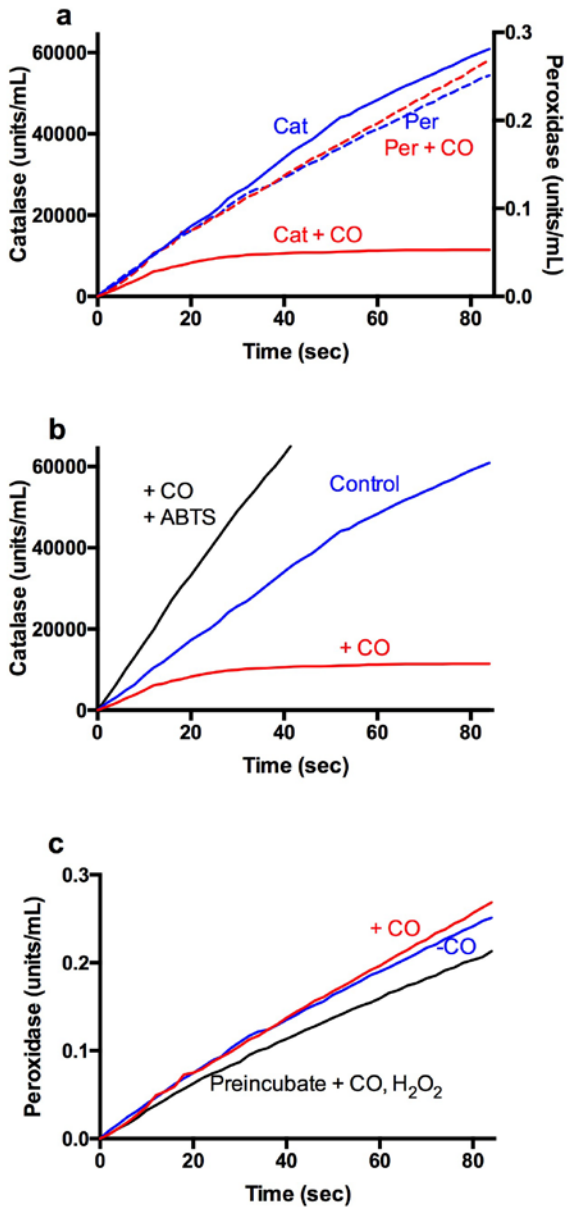

**Figure S1.** Effect of CO on catalase and peroxidase reactions of BpKatG. **Panel a:** The solid lines show catalase activity without (blue) and with (red) CO present in the buffer. The dashed lines show the peroxidase activity without (blue) and with (red) CO present. **Panel b:** Catalase activity is shown without CO (blue), with CO (red) and with CO and ABTS (black) in the buffer. **Panel c:** Peroxidase activity is shown without CO (blue), with CO (red) in the buffer. The trace in black shows the peroxidase activity following pre-incubation with CO and H<sub>2</sub>O<sub>2</sub> for 2 minutes prior to the addition of ABTS and H<sub>2</sub>O<sub>2</sub> to initiate the peroxidase reaction.

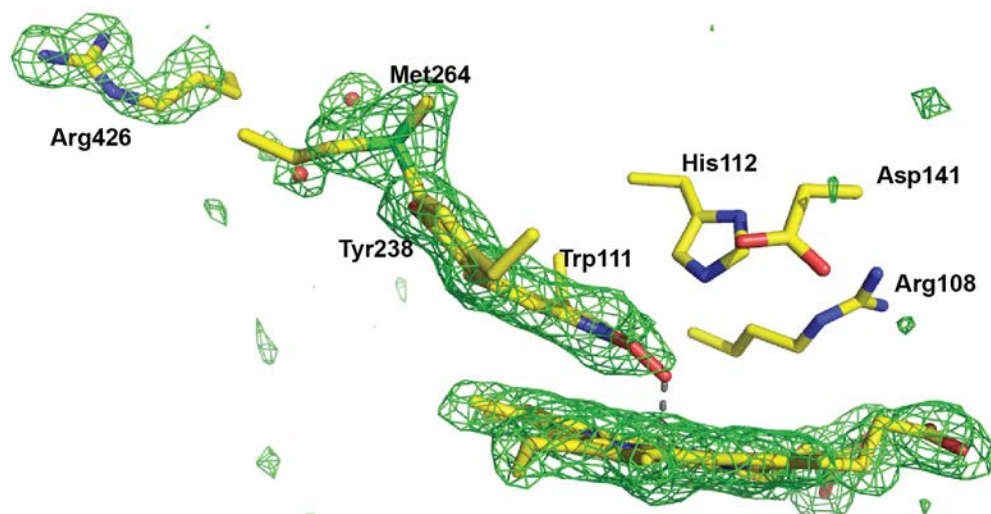

**Figure S2.** Heme and surrounding residues of WT BpKatG after soaking of the crystal in CO-saturated mother liquor containing 5 mM H<sub>2</sub>O<sub>2</sub>. The F<sub>o</sub>-F<sub>c</sub> omit electron density map at 5.0  $\sigma$  was calculated without the heme, Trp111, Tyr238, Met264 or Arg426 in the model. The absence of an iron ligand in the heme distal side appears unquestionable eliminating, in particular, the coordination of a CO molecule. Instead, the tryptophan of the adduct Trp111 shows a high occupancy of the perhydroxy modification, while the mobile arginine Arg426 is mostly in the **out** position, an unlikely intermediate in the catalase cycle <sup>S1</sup>.

S1. Loewen, P. C., Carpena, X., Vidossich, P., Fita, I. & Rovira, C. An ionizable active-site tryptophan imparts catalase activity to a peroxidase core. *J. Am. Chem. Soc.* **136**, 7249-7252 (2014).

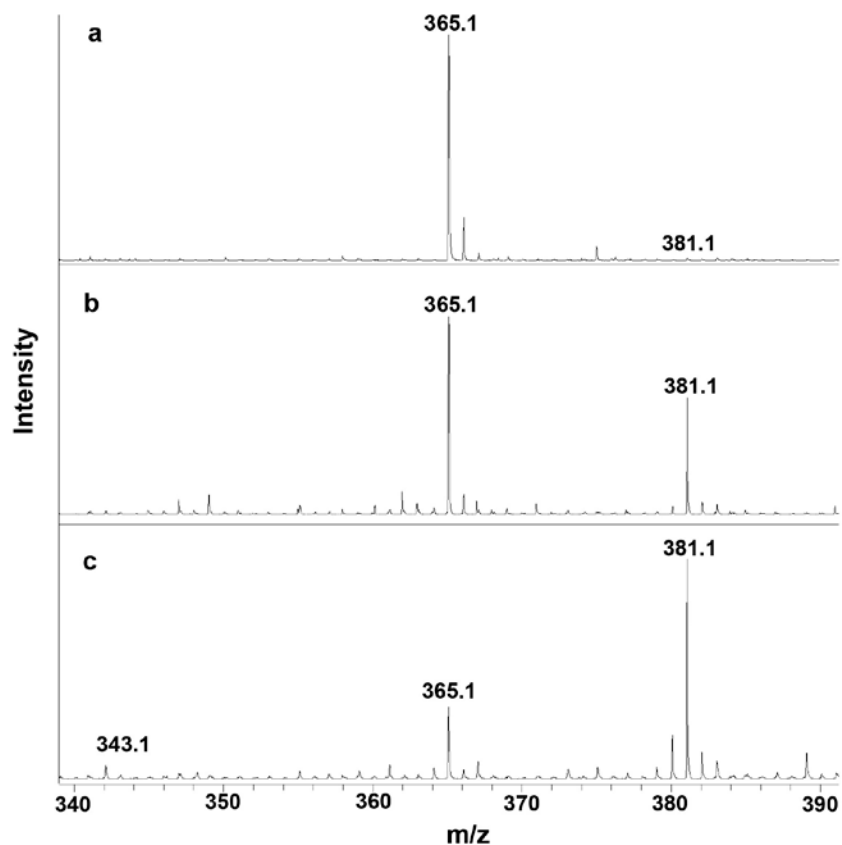

**Figure S3.** Mass spectrometry analysis of the oxidation products of maltose. Panel **a** contains the spectrum of maltose before treatment with KatG or glucose oxidase. The predominant ion has an associated sodium ion,  $343.1 + 22.0 = 365.1$ . The sample in panel **b** was incubated with  $1 \mu\text{g/mL}$  KatG for 15 minutes and the sample in panel **c** was incubated with  $1 \mu\text{g/mL}$  KatG supplemented with  $5 \text{ mg/mL}$  glucose oxidase and  $5 \text{ mM}$  glucose for 15 minutes.

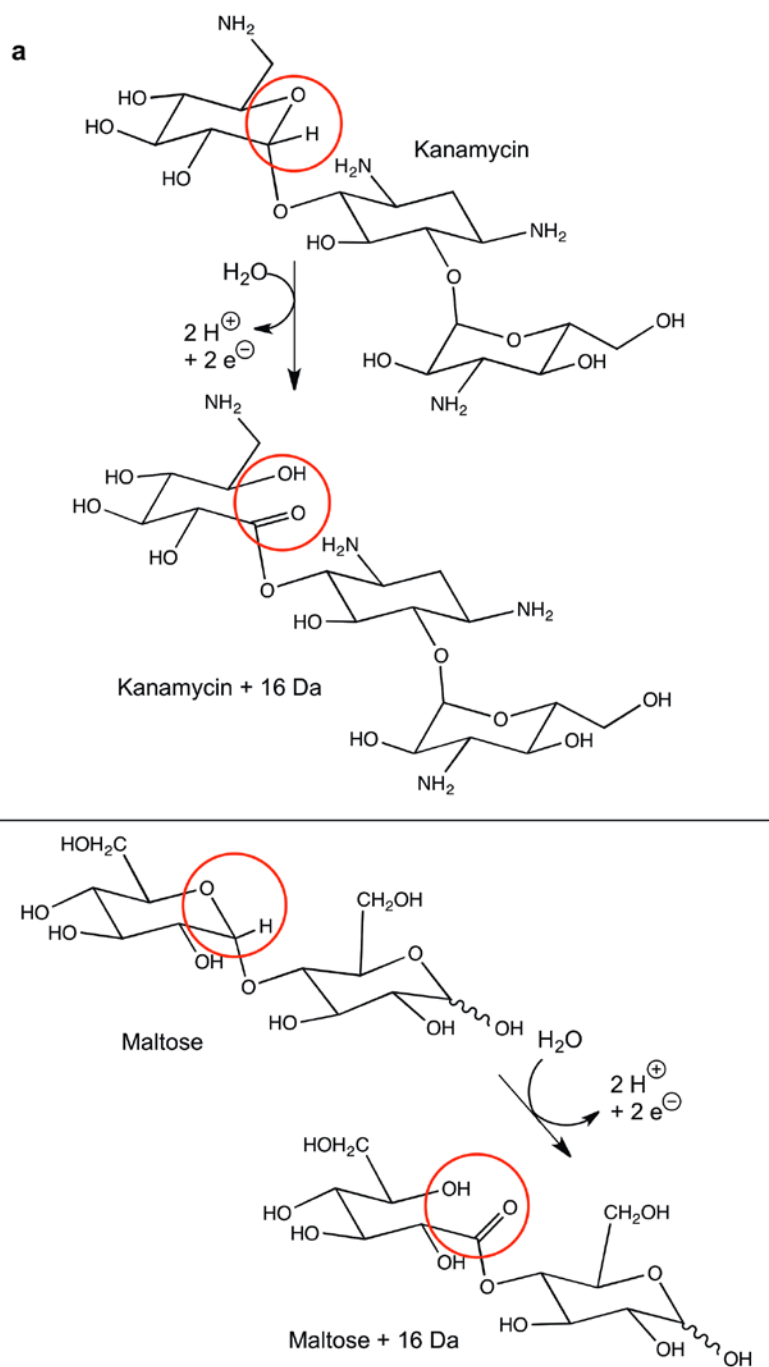

**Figure S4.** Schemes for the oxidation of kanamycin (panel **a**) and maltose (panel **b**) that are most consistent with the experimental data.

**Table S1: Bacterial strains and plasmids used**

| Bacterial Strains             | Relevant characteristics                                                                                                                            | Source                        |
|-------------------------------|-----------------------------------------------------------------------------------------------------------------------------------------------------|-------------------------------|
| <i>E. coli</i> MP180          | <i>thi-1</i> HfrH                                                                                                                                   | Ref. S2                       |
| <i>E. coli</i> UM120          | As MP180 but <i>katE12::Tn10</i>                                                                                                                    | Ref. S3                       |
| <i>E. coli</i> UM122          | As MP180 but <i>katF13::Tn10</i>                                                                                                                    | Ref. S3                       |
| <i>E. coli</i> UM202          | As MP180 but <i>katG17::Tn10</i>                                                                                                                    | Ref. S4                       |
| <i>E. coli</i> CSH7           | <i>lacY rpsL thi-1</i>                                                                                                                              | Cold Spring Harbor Collection |
| <i>E. coli</i> CSH57a         | <i>leuB6 proC83 purE42 trpE38 his-208 argG77 ilvA681 met-160 thi-1 ara-14 lacY1 galK2 xyl-5 mtl-1 azi-6 rpsL109 tonA23 tsx67 supE44 malA38 xthA</i> | Cold Spring Harbor Collection |
| <i>E. coli</i> UM1            | CSH7 <i>katE1 katG14</i> ( <sup>415</sup> C→T resulting in <sup>138</sup> Leu→Phe in KatG)                                                          | Ref. 2 & S5                   |
| <i>E. coli</i> UM2            | CSH57a <i>katE2 katG15</i> ( <sup>356</sup> G→A resulting in <sup>118</sup> Gly→Asp in KatG)                                                        | Ref. 2 & S5                   |
| <i>A. baumannii</i> ATCC17978 |                                                                                                                                                     |                               |
| <i>A. baumannii</i> AB155     | ATCC17978:Δ <i>katG</i>                                                                                                                             | This study                    |
| <i>A. baumannii</i> AB188     | ATCC17978:Δ <i>katE</i>                                                                                                                             | This study                    |
| <i>A. baumannii</i> AB189     | AB115:Δ <i>katE</i>                                                                                                                                 | This study                    |
| pMO130                        | Km <sup>r</sup> , suicide plasmid                                                                                                                   | Ref. 23                       |
| pFLP2                         | Ap <sup>r</sup> , <i>flp</i> -recombinase                                                                                                           | Ref. S6                       |
| pBluescript KS-<br>pBpKatG    | Ap <sup>r</sup><br>pBluescript KS expressing <i>katG</i> from <i>Burkholderia pseudomallei</i>                                                      | Ref 16                        |

S2. Pearson, M. L. The role of adenosine-3'-5'-cyclic mono-phosphate in the growth of bacteriophage lambda. *Virology* **49**, 605-609 (1972).

S3. Loewen, P. C. & Triggs, B. L. Genetic mapping of *katF*, a locus that with *katE*, affects the synthesis of a second catalase species in *Escherichia coli*. *J. Bacteriol.* **160**, 668-675 (1984).

S4. Loewen, P. C., Switala, J. & Triggs-Raine, B. L. Catalases HPI and HPII in *Escherichia coli* are induced independently. *Arch. Biochem. Biophys.* **243**, 144–149 (1985).

S5. Loewen, P. C. Isolation of catalase-deficient *Escherichia coli* mutants and genetic mapping of *katE*, a locus that affects catalase activity. *J. Bacteriol.* **157**, 622-626 (1984).

S6. Choi, K. H. & Schweizer, H. P. An improved method for rapid generation of unmarked *Pseudomonas aeruginosa* deletion mutants. BMC Microbiol. **5**:30 (2005).

**Table S2: Oligonucleotides used in this study**

| Primer                      | Sequence                                               | Source     | Product size |
|-----------------------------|--------------------------------------------------------|------------|--------------|
| <i>katG</i> Up Forward      | TTACTAAACCAAAAATCGGGAT                                 | This study | 1021 bp      |
| <i>katG</i> Gm Up Reverse   | AGGAACTTCAAGATCCCCAATTCGTGAC<br>ATGATTATATTCTCTCTGG    | This study |              |
| <i>katG</i> Gm Down Forward | TCAGAGCGCTTTTGAAGCTAATTCGGACT<br>TAGCTTAATTTAAGCCAAA   | This study | 1027 bp      |
| <i>katG</i> Down Reverse    | TGACACCCGTTTTTATAATCA                                  | This study |              |
| <i>katE</i> Up Forward      | GTCATGCCTATAAAGCCATT                                   | This study | 1019 bp      |
| <i>katE</i> Gm Up Reverse   | AGGAACTTCAAGATCCCCAATTCGAATTC<br>GAATACGCTCAGGTATACGCT | This study |              |
| <i>katE</i> Gm Down Forward | TCAGAGCGCTTTTGAAGCTAATTCGCGCT<br>TTCAGGGCTTTTTCTA      | This study | 925 bp       |
| <i>katE</i> Down Reverse    | TAGAGGTAGTCTAGACATGG                                   | This study |              |
| <i>katG</i> qRT Forward     | GGCGATGAAAAGAATGGTTA                                   | Ref. S7    | 185 bp       |
| <i>katG</i> qRT Reverse     | ATTTCTTCATCATCCATTGCC                                  | Ref. S7    |              |
| <i>katE</i> qRT Forward     | AACTTTGACTTCGATTTGCTGGA                                | Ref. S7    | 205 bp       |
| <i>katE</i> qRT Reverse     | TGTATGAAAATAGTCGGGCTTGT                                | Ref. S7    |              |

S7. Sun, D., Crowell, S. A., Harding, C. M., De Silva, P. M., Harrison, A., Fernando, D. M., Mason, K. M., Santana, E., Loewen, P. C., Kumar, A. & Liu, Y. *KatG* and *KatE* confer *Acinetobacter* resistance to hydrogen peroxide but sensitize bacteria to killing by phagocytic respiratory burst. *Life Sci.* **148**, 31-40 doi:10.1016/j.lfs.2016.02.015 (2016).



**Table S3 - Data collection and refinement statistics of BpKatG with maltose bound (6B9B) and after treatment with H<sub>2</sub>O<sub>2</sub> in CO-containing buffer (5KT9).**

| <i>A. Data collection statistics</i>  | 6B9B                                          | 5KT9                                          |
|---------------------------------------|-----------------------------------------------|-----------------------------------------------|
| Space group                           | P2 <sub>1</sub> 2 <sub>1</sub> 2 <sub>1</sub> | P2 <sub>1</sub> 2 <sub>1</sub> 2 <sub>1</sub> |
| a (Å)                                 | 100.42                                        | 100.85                                        |
| b (Å)                                 | 115.09                                        | 113.79                                        |
| c (Å)                                 | 174.98                                        | 174.63                                        |
| α, β, γ (°)                           | 90                                            | 90                                            |
| Resolution <sup>a</sup>               | 48.026 - 1.80<br>(1.90 - 1.80)                | 47.67 - 1.88<br>(1.98 - 1.88)                 |
| Unique reflections                    | 184,467 (27,052)                              | 162,264 (23,554)                              |
| Completeness %                        | 98.7 (99.8)                                   | 99.5 (99.7)                                   |
| R <sub>merge</sub>                    | 0.067 (0.568)                                 | 0.90 (0.570)                                  |
| R <sub>pim</sub>                      | 0.038 (0.332)                                 | 0.046 (0.293)                                 |
| <I/σI>                                | 12.9 (2.4)                                    | 10.7 (2.2)                                    |
| CC(1/2)                               | 0.998 (0.803)                                 | 0.998 (0.826)                                 |
| Multiplicity                          | 3.8 (3.8)                                     | 4.4 (4.6)                                     |
| <i>B Model refinement statistics</i>  |                                               |                                               |
| No. reflections                       | 175,184                                       | 153,938                                       |
| R <sub>cryst</sub> (%)                | 13.6                                          | 17.7                                          |
| R <sub>free</sub> (%)                 | 16.2                                          | 21.3                                          |
| Non-H atoms                           | 12,765                                        | 12,633                                        |
| Water Molecules                       | 1,452                                         | 1,415                                         |
| <i>Average B-factor Å<sup>2</sup></i> |                                               |                                               |
| Protein                               | 25.0                                          | 27.5                                          |
| Heme                                  | 17.9                                          | 20.3                                          |
| Waters                                | 33.8                                          | 36.4                                          |
| <i>Other</i>                          |                                               |                                               |
| Coor. err. Å <sup>b</sup>             | 0.058                                         | 0.101                                         |
| rms dev. bonds Å                      | 0.028                                         | 0.028                                         |
| rms dev. angles °                     | 2.29                                          | 2.24                                          |

<sup>a</sup> Values in parentheses correspond to the highest resolution shell

<sup>b</sup> Based on maximum likelihood
